# Supplementary material for: Enhancing the signal contrast ratio and stability of liquid crystal-based sensors by using fine grids made by photolithography of photoresists
Source: Royal Society of Chemistry journal article supplement (doi:10.1039/d1an00332a), 2021-01-01
Supplement: d1an00332a1.pdf [file d1an00332a1.pdf]

## Supplementary Material

# Enhancing the Signal Contrast Ratio and Stability of Liquid Crystal-based Sensors by Using Fine Grids Made by Photolithography of Photoresist

Jung-Jung Chang<sup>ab</sup>, Jih-Wei Huang<sup>a</sup>, Chun-Feng Lin<sup>b</sup>,

Shun-Wei Liu<sup>\*b</sup>, Chih-Hsin Chen<sup>\*a</sup>

<sup>a</sup> Department of Chemistry, Tamkang University, New Taipei City 251, Taiwan

<sup>b</sup> Department of Electronic Engineering and Organic Electronics Research Center, Ming Chi University of Technology, New Taipei City 24301, Taiwan

Corresponding author: Prof. Dr. Chih-Hsin Chen

E-mail: [chc@mail.tku.edu.tw](mailto:chc@mail.tku.edu.tw)

Tel: +886-2-2621-5656

Corresponding author: Prof. Dr. Shun-Wei Liu

E-mail: [swliu@mail.mcut.edu.tw](mailto:swliu@mail.mcut.edu.tw)

Tel: +886-2-2908-9899

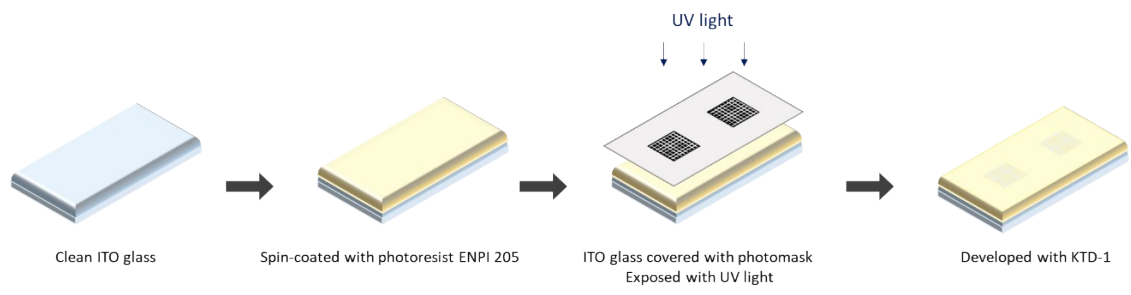

**Figure S1.** The process diagram of photolithography.

|                             |             | 0 min                                                                             | 2 h                                                                               | 8 h                                                                                | 24 h                                                                                |
|-----------------------------|-------------|-----------------------------------------------------------------------------------|-----------------------------------------------------------------------------------|------------------------------------------------------------------------------------|-------------------------------------------------------------------------------------|
| PR grid<br>3 $\mu\text{m}$  | Planar      | 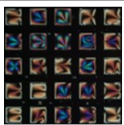 |  |  |  |
| Cu grid<br>20 $\mu\text{m}$ | Homeotropic |  |  |  |  |
| PR grid<br>3 $\mu\text{m}$  | Planar      |  |  |  |  |
| Cu grid<br>20 $\mu\text{m}$ | Homeotropic |  |  |  |  |

**Figure S2.** The POM images of the photoresist grids and copper grids filled with 5CB in planar orientation (immersing in the deionized water) and homeotropic orientation (immersing in the deionized water containing 0.01% SDS) for long-term stability testing.

| PBS + HCl/NaOH |         | 0 min                                                                              | 2 hr                                                                               | 8 hr                                                                                | 24 hr                                                                                |
|----------------|---------|------------------------------------------------------------------------------------|------------------------------------------------------------------------------------|-------------------------------------------------------------------------------------|--------------------------------------------------------------------------------------|
| <b>pH 4</b>    | PR grid | 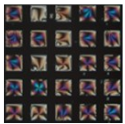  |   |   |   |
|                | Cu grid |   |   |   |   |
| <b>pH 7</b>    | PR grid |   |   |   |   |
|                | Cu grid |   |   |   |   |
| <b>pH 10</b>   | PR grid |   |   |   |   |
|                | Cu grid |  |  |  |  |

**Figure S3.** The POM images of the photoresist grids and copper grids filled with 5CB immersing in the aqueous solution at pH 4, pH 7 and pH 10 prepared with PBS buffer solution.

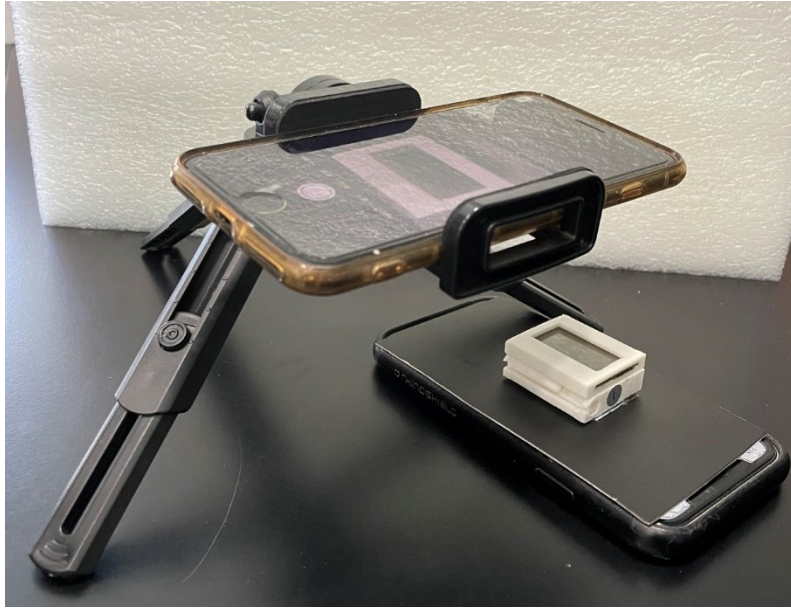

**Figure S4.** The layout of the experiments using a smart phone to capture the LC images under ambient light.
